# Supplementary material for: Haemoglobin thresholds to define anaemia in a national sample of healthy children and adolescents aged 1–19 years in India: a population-based study
Source: PubMed Central journal article supplement (PMC7612991; doi:10.1016/s2214-109x(21)00077-2), 2021-04-16

# THE LANCET

## Global Health

### Supplementary appendix 5

This appendix formed part of the original submission and has been peer reviewed. We post it as supplied by the authors.

Supplement to: Sachdev HS, Porwal A, Acharya R, et al. Haemoglobin thresholds to define anaemia in a national sample of healthy children and adolescents aged 1–19 years in India: a population-based study. *Lancet Glob Health* 2021; published online April 16. [https://doi.org/10.1016/S2214-109X\(21\)00077-2](https://doi.org/10.1016/S2214-109X(21)00077-2).

## **Online Supplementary Material**

### **Haemoglobin thresholds to define anaemia in a national sample of healthy children and adolescents aged 1–19 years in India: a population-based study**

Harshpal Singh Sachdev, Akash Porwal, Rajib Acharya, Sana Ashraf, Sowmya Ramesh, Nizamuddin Khan,

Umesh Kapil, Anura V Kurpad, Avina Sarna

**Supplementary Table 1: Socio-demographic characteristics of the primary analytic sample and their comparison with the non-analytic sample.**

| Background characteristics     | 1-4 years                          |              |                                |              |         | 5-9 years                          |              |                                |              |         | 10-19 years                        |              |                                |              |         |
|--------------------------------|------------------------------------|--------------|--------------------------------|--------------|---------|------------------------------------|--------------|--------------------------------|--------------|---------|------------------------------------|--------------|--------------------------------|--------------|---------|
|                                | Non-Analytical Sample <sup>s</sup> |              | Analytical Sample <sup>#</sup> |              | p-value | Non-Analytical Sample <sup>s</sup> |              | Analytical Sample <sup>#</sup> |              | p-value | Non-Analytical Sample <sup>s</sup> |              | Analytical Sample <sup>#</sup> |              | p-value |
|                                | n                                  | % /Mean (SD) | n                              | % /Mean (SD) |         | n                                  | % /Mean (SD) | n                              | % /Mean (SD) |         | n                                  | % /Mean (SD) | n                              | % /Mean (SD) |         |
| <b>Age (in years)</b>          | 9479                               | 2.7 (1.1)    | 2137                           | 2.9 (1.0)    | <0.001  | 11670                              | 7.0 (1.4)    | 3461                           | 7.1 (1.4)    | 0.556   | 11963                              | 14.3 (2.8)   | 2489                           | 13.9 (2.8)   | <0.001  |
| <b>Hemoglobin (in g/dl)</b>    | 9479                               | 11.4 (1.7)   | 2137                           | 11.9 (1.1)   | <0.001  | 11670                              | 12.3 (1.4)   | 3461                           | 12.5 (1.0)   | <0.001  | 11963                              | 12.9 (1.8)   | 2489                           | 13.1 (1.3)   | <0.001  |
| <b>Anthropometric Measures</b> |                                    |              |                                |              |         |                                    |              |                                |              |         |                                    |              |                                |              |         |
| HAZ (z-score)                  | 9225                               | -1.4 (1.4)   | 2067                           | -1.2 (1.3)   | <0.001  | 11247                              | -1.0 (1.3)   | 3351                           | -0.8 (1.2)   | <0.001  | 10980                              | -1.3 (1.1)   | 2298                           | -1.2 (1.2)   | 0.035   |
| WAZ (z-score)                  | 9263                               | -1.3 (1.2)   | 2069                           | -1.2 (1.2)   | <0.001  | 11442                              | -1.3 (1.3)   | 3350                           | -1.1 (1.3)   | <0.001  | NA                                 | NA           | NA                             | NA           | NA      |
| WHZ (z-score)                  | 9084                               | -0.8 (1.2)   | 2032                           | -0.8 (1.2)   | 0.025   | NA                                 | NA           | NA                             | NA           | NA      | NA                                 | NA           | NA                             | NA           | NA      |
| BMI-for-age (z-score)          | NA                                 | NA           | NA                             | NA           | NA      | 11334                              | -1.0 (1.2)   | 3323                           | -0.9 (1.3)   | <0.001  | 10947                              | -0.9 (1.3)   | 2287                           | -0.9 (1.32)  | 0.676   |
| <b>Sex</b>                     |                                    |              |                                |              | 0.083   |                                    |              |                                |              | 0.003   |                                    |              |                                |              |         |
| Boys                           | 5098                               | 53.8         | 1105                           | 51.7         |         | 6105                               | 52.3         | 1910                           | 55.2         |         | 6019                               | 50.3         | 1360                           | 54.6         |         |
| Girls                          | 4381                               | 46.2         | 1032                           | 48.3         |         | 5565                               | 47.7         | 1551                           | 44.8         |         | 5944                               | 49.7         | 1129                           | 45.4         |         |
| <b>Place of Residence</b>      |                                    |              |                                |              | 0.158   |                                    |              |                                |              | 0.002   |                                    |              |                                |              | 0.001   |
| Rural                          | 5362                               | 56.6         | 1173                           | 54.9         |         | 6738                               | 57.7         | 1895                           | 54.8         |         | 6953                               | 58.1         | 1356                           | 54.5         |         |
| Urban                          | 4117                               | 43.4         | 964                            | 45.1         |         | 4932                               | 42.3         | 1566                           | 45.3         |         | 5010                               | 41.9         | 1133                           | 45.5         |         |
| <b>Region</b>                  |                                    |              |                                |              | <0.001  |                                    |              |                                |              | <0.001  |                                    |              |                                |              | <0.001  |
| North                          | 1860                               | 19.6         | 407                            | 19.1         |         | 2541                               | 21.8         | 795                            | 23.0         |         | 2720                               | 22.7         | 628                            | 25.2         |         |
| Central                        | 793                                | 8.4          | 104                            | 4.9          |         | 1327                               | 11.4         | 219                            | 6.3          |         | 1305                               | 10.9         | 132                            | 5.3          |         |
| East                           | 1743                               | 18.4         | 576                            | 27.0         |         | 1888                               | 16.2         | 839                            | 24.2         |         | 1891                               | 15.8         | 626                            | 25.2         |         |
| West                           | 1219                               | 12.9         | 118                            | 5.5          |         | 1450                               | 12.4         | 203                            | 5.9          |         | 1467                               | 12.3         | 140                            | 5.6          |         |
| South                          | 1608                               | 17.0         | 338                            | 15.8         |         | 1839                               | 15.8         | 482                            | 13.9         |         | 1950                               | 16.3         | 260                            | 10.5         |         |
| North-East                     | 2256                               | 23.8         | 594                            | 27.8         |         | 2525                               | 22.5         | 923                            | 26.7         |         | 2630                               | 22.0         | 703                            | 28.2         |         |
| <b>Religion</b>                |                                    |              |                                |              | <0.001  |                                    |              |                                |              | <0.001  |                                    |              |                                |              | <0.001  |
| Hindu                          | 6780                               | 71.5         | 1486                           | 69.5         |         | 8461                               | 72.5         | 2410                           | 69.6         |         | 8850                               | 74.0         | 1692                           | 68.0         |         |
| Muslim                         | 1085                               | 11.5         | 314                            | 14.7         |         | 1273                               | 10.9         | 524                            | 15.1         |         | 1240                               | 10.4         | 387                            | 15.6         |         |
| Christian                      | 992                                | 10.5         | 222                            | 10.4         |         | 1235                               | 10.6         | 327                            | 9.5          |         | 1172                               | 9.8          | 264                            | 10.6         |         |
| Sikh                           | 236                                | 2.5          | 21                             | 1.0          |         | 273                                | 2.3          | 48                             | 1.4          |         | 300                                | 2.5          | 35                             | 1.4          |         |

| Background characteristics | 1-4 years                          |              |                                |              |         | 5-9 years                          |              |                                |              |         | 10-19 years                        |              |                                |              |         |
|----------------------------|------------------------------------|--------------|--------------------------------|--------------|---------|------------------------------------|--------------|--------------------------------|--------------|---------|------------------------------------|--------------|--------------------------------|--------------|---------|
|                            | Non-Analytical Sample <sup>§</sup> |              | Analytical Sample <sup>#</sup> |              | p-value | Non-Analytical Sample <sup>§</sup> |              | Analytical Sample <sup>#</sup> |              | p-value | Non-Analytical Sample <sup>§</sup> |              | Analytical Sample <sup>#</sup> |              | p-value |
|                            | n                                  | % /Mean (SD) | n                              | % /Mean (SD) |         | n                                  | % /Mean (SD) | n                              | % /Mean (SD) |         | n                                  | % /Mean (SD) | n                              | % /Mean (SD) |         |
| Others                     | 386                                | 4.1          | 94                             | 4.4          |         | 428                                | 3.7          | 152                            | 4.4          |         | 401                                | 3.4          | 111                            | 4.5          |         |
| <b>Wealth Index</b>        |                                    |              |                                |              | <0.001  |                                    |              |                                |              | <0.001  |                                    |              |                                |              | <0.001  |
| Poorest                    | 724                                | 7.6          | 121                            | 5.7          |         | 903                                | 7.7          | 186                            | 5.4          |         | 1017                               | 8.5          | 165                            | 6.6          |         |
| Poor                       | 1237                               | 13.1         | 202                            | 9.5          |         | 1423                               | 12.2         | 364                            | 10.5         |         | 1632                               | 13.6         | 298                            | 12.0         |         |
| Middle                     | 2013                               | 21.2         | 418                            | 19.56        |         | 2279                               | 19.5         | 648                            | 18.7         |         | 2398                               | 20.1         | 471                            | 18.9         |         |
| Rich                       | 2601                               | 27.4         | 626                            | 29.3         |         | 3285                               | 28.2         | 969                            | 28.0         |         | 3159                               | 26.4         | 691                            | 27.8         |         |
| Richest                    | 2904                               | 30.6         | 770                            | 36.0         |         | 3780                               | 32.4         | 1294                           | 37.4         |         | 3757                               | 31.4         | 864                            | 34.7         |         |

<sup>§</sup>Non-Analytical Sample: Overall participants with a blood sample collected, excluding participants in analytical sample 1 (see below).

<sup>#</sup>Analytical Sample 1 (See text): Excluded participants with iron, folate, vitamin B12 and retinol deficiencies, inflammation (based on C-reactive protein), variant Hb (HbA2 and HbS), and smokers.

NA: Not Applicable

**Supplementary Table 2. Smoothed haemoglobin (g/dl) percentiles from primary analytic sample at yearly intervals from 1-19 years.**

| Age (years) | Boys  |      |       |       |       |       |       |       |       |       | Girls |      |       |       |       |       |       |       |       |       |
|-------------|-------|------|-------|-------|-------|-------|-------|-------|-------|-------|-------|------|-------|-------|-------|-------|-------|-------|-------|-------|
|             | M     | S    | L     | C5    | C25   | C50   | C75   | C85   | C90   | C95   | M     | S    | L     | C5    | C25   | C50   | C75   | C85   | C90   | C95   |
| 1           | 11.03 | 0.12 | -0.10 | 9.12  | 10.20 | 11.03 | 11.94 | 12.46 | 12.83 | 13.39 | 10.97 | 0.12 | -1.38 | 9.25  | 10.18 | 10.97 | 11.93 | 12.53 | 12.98 | 13.73 |
| 2           | 11.28 | 0.11 | -0.10 | 9.46  | 10.49 | 11.28 | 12.14 | 12.63 | 12.97 | 13.50 | 11.26 | 0.11 | -1.25 | 9.60  | 10.51 | 11.26 | 12.16 | 12.71 | 13.11 | 13.77 |
| 3           | 11.52 | 0.10 | -0.10 | 9.77  | 10.77 | 11.52 | 12.33 | 12.79 | 13.12 | 13.61 | 11.54 | 0.10 | -1.12 | 9.92  | 10.81 | 11.54 | 12.37 | 12.88 | 13.25 | 13.84 |
| 4           | 11.74 | 0.09 | -0.09 | 10.06 | 11.02 | 11.74 | 12.52 | 12.96 | 13.26 | 13.73 | 11.77 | 0.09 | -0.99 | 10.19 | 11.07 | 11.77 | 12.57 | 13.04 | 13.39 | 13.93 |
| 5           | 11.93 | 0.09 | -0.09 | 10.30 | 11.23 | 11.93 | 12.68 | 13.10 | 13.40 | 13.85 | 11.96 | 0.09 | -0.86 | 10.40 | 11.27 | 11.96 | 12.73 | 13.19 | 13.51 | 14.02 |
| 6           | 12.09 | 0.09 | -0.09 | 10.49 | 11.40 | 12.09 | 12.81 | 13.22 | 13.51 | 13.95 | 12.10 | 0.09 | -0.73 | 10.54 | 11.42 | 12.10 | 12.87 | 13.31 | 13.63 | 14.12 |
| 7           | 12.22 | 0.08 | -0.09 | 10.65 | 11.55 | 12.22 | 12.93 | 13.33 | 13.61 | 14.04 | 12.21 | 0.09 | -0.59 | 10.62 | 11.52 | 12.21 | 12.98 | 13.42 | 13.73 | 14.22 |
| 8           | 12.33 | 0.08 | -0.08 | 10.78 | 11.67 | 12.33 | 13.04 | 13.43 | 13.71 | 14.13 | 12.30 | 0.09 | -0.46 | 10.68 | 11.59 | 12.30 | 13.06 | 13.51 | 13.82 | 14.30 |
| 9           | 12.44 | 0.08 | -0.08 | 10.88 | 11.77 | 12.44 | 13.15 | 13.55 | 13.83 | 14.25 | 12.36 | 0.09 | -0.33 | 10.71 | 11.65 | 12.36 | 13.13 | 13.57 | 13.88 | 14.36 |
| 10          | 12.56 | 0.08 | -0.08 | 10.97 | 11.88 | 12.56 | 13.29 | 13.70 | 13.98 | 14.41 | 12.40 | 0.09 | -0.20 | 10.73 | 11.68 | 12.40 | 13.17 | 13.60 | 13.91 | 14.38 |
| 11          | 12.70 | 0.08 | -0.08 | 11.06 | 12.00 | 12.70 | 13.45 | 13.87 | 14.17 | 14.61 | 12.40 | 0.09 | -0.07 | 10.73 | 11.69 | 12.40 | 13.16 | 13.59 | 13.89 | 14.35 |
| 12          | 12.87 | 0.09 | -0.07 | 11.17 | 12.14 | 12.87 | 13.64 | 14.07 | 14.38 | 14.84 | 12.38 | 0.09 | 0.07  | 10.72 | 11.68 | 12.38 | 13.13 | 13.55 | 13.84 | 14.29 |
| 13          | 13.05 | 0.09 | -0.07 | 11.32 | 12.31 | 13.05 | 13.84 | 14.29 | 14.60 | 15.07 | 12.36 | 0.09 | 0.20  | 10.70 | 11.66 | 12.36 | 13.10 | 13.51 | 13.79 | 14.22 |
| 14          | 13.26 | 0.09 | -0.07 | 11.50 | 12.50 | 13.26 | 14.06 | 14.51 | 14.82 | 15.30 | 12.34 | 0.09 | 0.33  | 10.68 | 11.64 | 12.34 | 13.06 | 13.46 | 13.74 | 14.16 |
| 15          | 13.48 | 0.09 | -0.07 | 11.71 | 12.72 | 13.48 | 14.28 | 14.74 | 15.05 | 15.53 | 12.30 | 0.09 | 0.46  | 10.64 | 11.60 | 12.30 | 13.02 | 13.42 | 13.69 | 14.10 |
| 16          | 13.71 | 0.08 | -0.06 | 11.94 | 12.95 | 13.71 | 14.51 | 14.97 | 15.28 | 15.76 | 12.26 | 0.09 | 0.59  | 10.59 | 11.56 | 12.26 | 12.98 | 13.37 | 13.64 | 14.04 |
| 17          | 13.94 | 0.08 | -0.06 | 12.18 | 13.19 | 13.94 | 14.74 | 15.19 | 15.50 | 15.97 | 12.23 | 0.09 | 0.73  | 10.54 | 11.53 | 12.23 | 12.95 | 13.34 | 13.60 | 14.00 |
| 18          | 14.16 | 0.08 | -0.06 | 12.42 | 13.42 | 14.16 | 14.95 | 15.40 | 15.71 | 16.17 | 12.23 | 0.09 | 0.86  | 10.51 | 11.52 | 12.23 | 12.94 | 13.33 | 13.59 | 13.98 |
| 19          | 14.38 | 0.08 | -0.06 | 12.65 | 13.64 | 14.38 | 15.16 | 15.60 | 15.90 | 16.36 | 12.24 | 0.09 | 0.99  | 10.49 | 11.52 | 12.24 | 12.96 | 13.35 | 13.61 | 14.00 |

C: Centile; for example, C5 refers to 5<sup>th</sup> centile (percentile); L: Skewness of distribution; M: Median of distribution; S: Coefficient of variation of distribution

Supplementary Figure 1. Comparison of mean and their 95% CIs (bands) of haemoglobin in the five analytic samples.

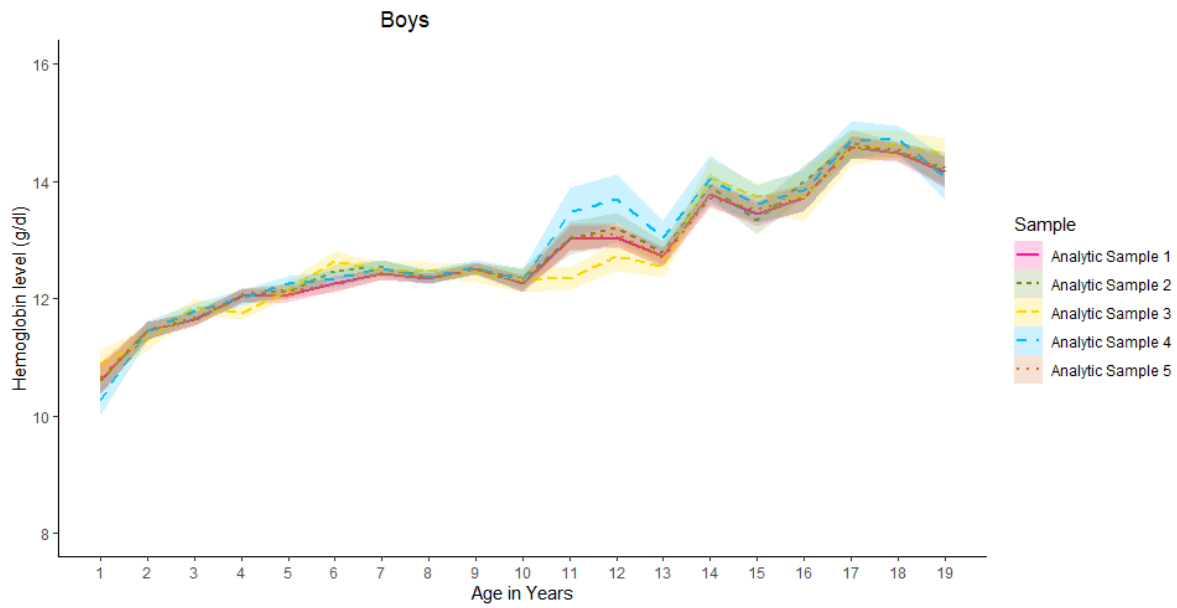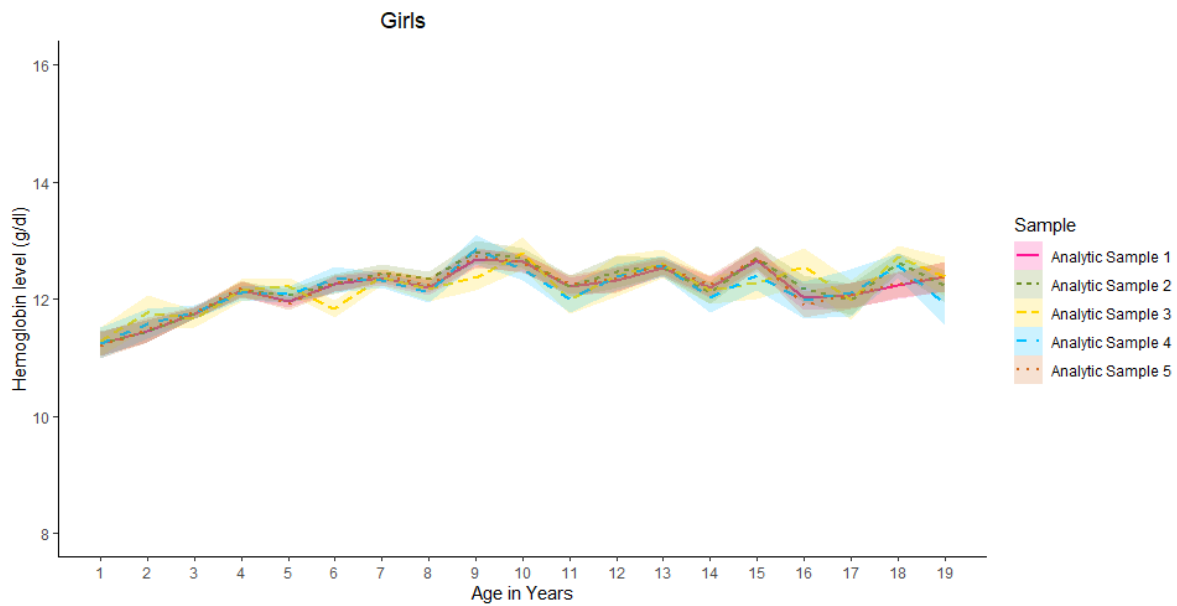

Supplementary Figure 2. Comparison of 5<sup>th</sup> percentile and their 95% CIs (bands) of haemoglobin in the five analytic samples.

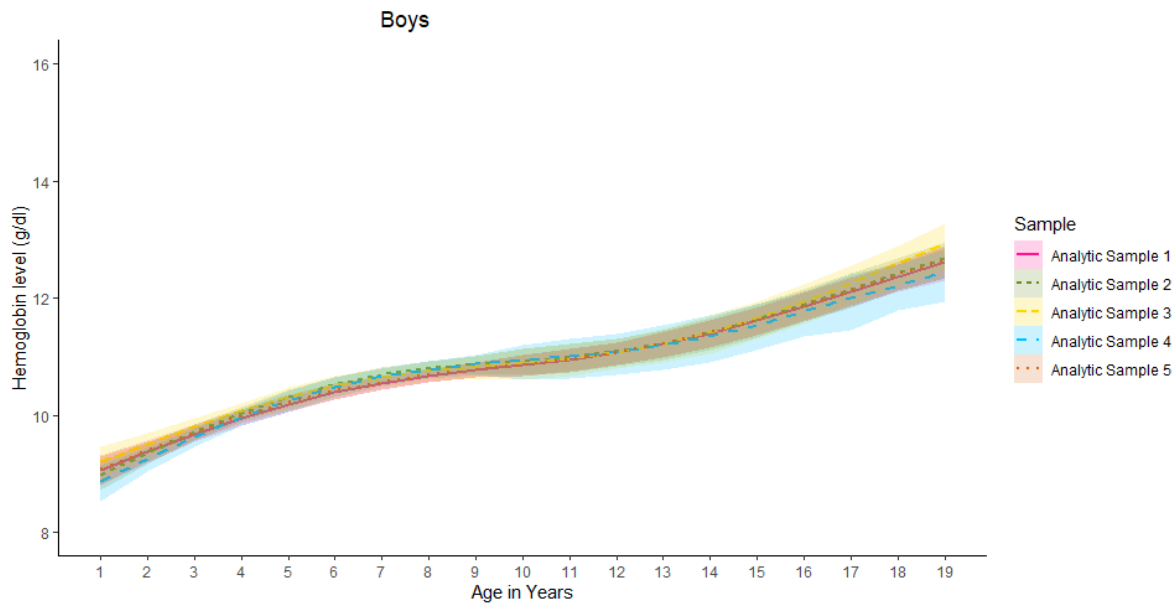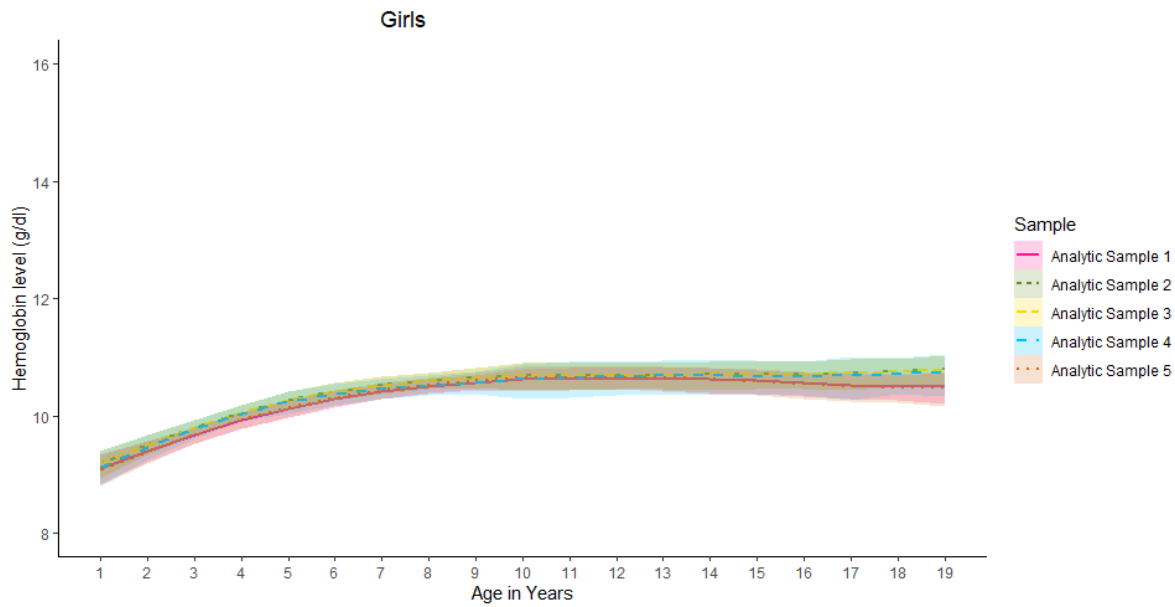

Supplement: EMS146378-supplement-Appendix_5.pdf [file EMS146378-supplement-Appendix_5.pdf]
